# Supplementary material for: Heat, Heatwaves and Cardiorespiratory Hospital Admissions in Helsinki, Finland
Source: Preprints.org preprint supplement (doi:10.20944/preprints202009.0550.v1), 2020-09-23
Supplement: Supplementary file 1 [file supplementary]

## Sheet: Sheet1
Table 1: Association between temprature (lag 1) and hospital admissions (all ages)using Case Crossover Poisson modeling
			Model A							Model D
Outcome	Beta	SE	Risk ratio	Low 95%	Upp 95%	p-value		Beta	SE	Risk ratio	Low 95%	Up 95%	p-value
CVD	-0.002405	0.001539	0.997598	0.994593	1.00061	0.118084		-0.0031404	0.0019549	0.996865	0.993052	1.00069	0.108181
RES	-0.003137	0.001769	0.996868	0.993418	1.00033	0.076287		-0.0085296	0.0022378	0.991507	0.987167	0.995865	0.000138
MI	-0.0024938	0.004418	0.997509	0.988909	1.00618	0.57244		0.0003833	0.0055847	1.00038	0.989493	1.01139	0.94528
ISC	-0.0008665	0.0032206	0.999134	0.992847	1.00546	0.787886		-3.61e-06	0.004097	0.999996	0.991998	1.00806	0.999297
CER	-0.0027012	0.0035868	0.997302	0.990316	1.00434	0.4514		-0.0033636	0.0045915	0.996642	0.987713	1.00565	0.46382
ARR	-0.0042245	0.0037359	0.995784	0.98852	1.0031	0.258144		-0.0058018	0.004705	0.994215	0.985089	1.00343	0.21753
AST	-0.01432	0.006504	0.985782	0.973295	0.998429	0.02772		-0.01967	0.008073	0.980522	0.965129	0.99616	0.01484
COPD	-0.0001112	0.0047641	0.999889	0.990596	1.00927	0.981373		0.004184	0.006036	1.00419	0.992383	1.01614	0.4882
Pneu	0.0019812	0.0030169	1.00198	0.996076	1.00793	0.006173		-0.004108	0.003858	0.9959	0.988398	1.00346	0.286988
Table 2: Association between temprature (lag 1) and hospital admissions (18-64)using Case Crossover Poisson modeling
			Model A							Model D
Outcome	Beta	SE	Risk ratio	Low 95%	Upp 95%	p-value		Beta	SE	Risk ratio	Low 95%	Up 95%	p-value
CVD	-0.005949	0.003022	0.994069	0.988198	0.999974	0.049044		-0.0039642	0.0038414	0.996044	0.988572	1.00357	0.30208
RES	0.00256	0.003278	1.00256	0.996143	1.00903	0.434932		-0.0033595	0.0041768	0.996646	0.98852	1.00484	0.421211
MI	-0.004485	0.008009	0.995525	0.98002	1.01128	0.57548		-0.006225	0.01005	0.993794	0.97441	1.01356	0.5355
ISC	-0.004905	0.00607	0.995107	0.983338	1.00702	0.419007		-0.00416	0.007728	0.995849	0.980878	1.01105	0.59034
CER	-0.008961	0.00695	0.991079	0.97767	1.00467	0.1973		0.003559	0.008933	1.00357	0.986147	1.02129	0.69035
ARR	-0.004165	0.007697	0.995844	0.980933	1.01098	0.588413		-0.00915	0.009589	0.990892	0.972442	1.00969	0.34
AST	0.009463	0.0119	1.00951	0.986235	1.03333	0.426		0.006148	0.01507	1.00617	0.976882	1.03633	0.6834
COPD	0.009144	0.009945	1.00919	0.989705	1.02905	0.358		0.02154	0.01283	1.02177	0.9964	1.04779	0.0933
Pneu	-0.00162	0.005758	0.998381	0.987177	1.00971	0.77852		-0.01557	0.007391	0.984551	0.970391	0.998917	0.03512
Table 3: Association between temprature (lag 1) and hospital admissions (65-74)using Case Crossover Poisson modeling
			Model A							Model D
Outcome	Beta	SE	Risk ratio	Low 95%	Upp 95%	p-value		Beta	SE	Risk ratio	Low 95%	Up 95%	p-value
CVD	-0.0013468	0.0032795	0.998654	0.992256	1.00509	0.68131		-0.0017406	0.0041834	0.998261	0.990109	1.00648	0.677365
RES	-0.0009179	0.0041965	0.999083	0.990899	1.00733	0.82686		-0.0019255	0.0053109	0.998076	0.987741	1.00852	0.71693
MI	0.002325	0.009295	1.00233	0.984232	1.02076	0.8025		0.008385	0.01169	1.00842	0.985578	1.03179	0.4733
ISC	0.001396	0.006661	1.0014	0.988408	1.01456	0.834		0.003239	0.008433	1.00324	0.986798	1.01996	0.7009
CER	0.002682	0.007118	1.00269	0.988794	1.01677	0.7063		-0.005064	0.00917	0.994949	0.977226	1.01299	0.5808
ARR	0.001032	0.007833	1.00103	0.985781	1.01652	0.8952		0.009022	0.009953	1.00906	0.989569	1.02894	0.3647
AST	-0.03487	0.01889	0.965731	0.930629	1.00216	0.0649		-0.04156	0.02401	0.959292	0.915194	1.00551	0.0835
COPD	0.00111	0.008213	1.00111	0.985124	1.01736	0.892		0.004585	0.01039	1.0046	0.984344	1.02526	0.659
Pneu	-0.003454	0.007037	0.996552	0.982901	1.01039	0.6235		-0.009452	0.008937	0.990593	0.973392	1.0081	0.2903
Table 4: Association between temprature (lag 1) and hospital admissions (75 plus)using Case Crossover Poisson modeling
			Model A							Model D
Outcome	Beta	SE	Risk ratio	Low 95%	Upp 95%	p-value		Beta	SE	Risk ratio	Low 95%	Up 95%	p-value
CVD	-0.0009132	0.002141	0.999087	0.994903	1.00329	0.669744		-0.0033593	0.0027161	0.996646	0.991355	1.00197	0.216147
RES	-0.0008235	0.0030061	0.999177	0.993307	1.00508	0.78412		-0.001761	0.003839	0.998241	0.990758	1.00578	0.64649
MI	-0.003355	0.006451	0.996651	0.984128	1.00933	0.60305		0.001131	0.008243	1.00113	0.985087	1.01744	0.89091
ISC	0.0004096	0.0046282	1.00041	0.991376	1.00953	0.92947		0.0008755	0.005909	1.00088	0.989351	1.01254	0.8822
CER	-0.0014006	0.0051918	0.9986	0.98849	1.00881	0.78733		-0.005617	0.006617	0.994399	0.981585	1.00738	0.39591
ARR	-0.007174	0.005147	0.992852	0.982886	1.00292	0.163351		-0.011399	0.006512	0.988666	0.976127	1.00137	0.08004
AST	-0.01804	0.01313	0.982122	0.957169	1.00772	0.17		-0.01685	0.01601	0.983291	0.952915	1.01464	0.2927
COPD	-0.006584	0.007243	0.993438	0.979434	1.00764	0.3633		-0.004985	0.009126	0.995027	0.977388	1.01299	0.5849
Pneu	0.007481	0.00446	1.00751	0.99874	1.01635	0.09349		0.006928	0.005762	1.00695	0.995644	1.01839	0.22925
